# Supplementary material
Source: PubMed Central journal article supplement (PMC4335926)

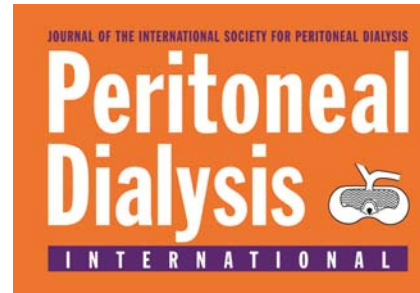

**Supplemental Materials for**

**Baseline Serum Interleukin-6 Predicts Cardiovascular Events in Incident Peritoneal Dialysis Patients**

*Yeoungjee Cho, David W. Johnson, David A. Vesey, Carmel M. Hawley, Elaine M. Pascoe, Margaret Clarke, Nicholas Topley on behalf of the balANZ Trial Investigators*

Correspondence to: D. W. Johnson, Department of Nephrology, Level 2, ARTS Building, Princess Alexandra Hospital, Ipswich Road, Woolloongabba, Brisbane, Queensland 4102, Australia. [David.johnson2@health.qld.gov.au](mailto:David.johnson2@health.qld.gov.au)

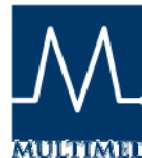

**Supplemental Table 1: Multilevel linear regression to evaluate the effect of peritoneal dialysis solution type on serum interleukin-6 concentrations.**

| Variable                                | All patients (n=175)   |                |           | Complete patients (n=75) |                |           |
|-----------------------------------------|------------------------|----------------|-----------|--------------------------|----------------|-----------|
|                                         | Regression coefficient | Standard error | P values  | Regression coefficient   | Standard error | P values  |
| PD solution                             |                        |                |           |                          |                |           |
| - Control                               | Reference              | Reference      | Reference | Reference                | Reference      | Reference |
| - Biocompatible                         | 0.22                   | 0.12           | 0.06      | 0.13                     | 0.16           | 0.41      |
| Time                                    |                        |                | 0.001     |                          |                | <0.001    |
| - Month 6                               | Reference              | Reference      | Reference | Reference                | Reference      | Reference |
| - Month 12                              | 0.12                   | 0.09           | 0.21      | 0.14                     | 0.11           | 0.20      |
| - Month 18                              | 0.23                   | 0.09           | 0.01      | 0.30                     | 0.11           | 0.006     |
| - Month 24                              | 0.39                   | 0.10           | <0.001    | 0.43                     | 0.11           | <0.001    |
| Baseline Log <sub>10</sub> IL-6 (pg/mL) | 0.40                   | 0.06           | <0.001    | 0.41                     | 0.07           | <0.001    |

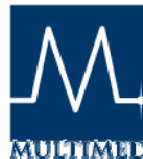

|                                      |           |           |           |           |           |           |
|--------------------------------------|-----------|-----------|-----------|-----------|-----------|-----------|
| PD solution type * Time <sup>#</sup> |           |           | 0.12      |           |           | 0.10      |
| - month 6                            | Reference | Reference | Reference | Reference | Reference | Reference |
| - month 12                           |           |           |           |           |           |           |
| - month 18                           | 0.04      | 0.13      | 0.76      | 0.16      | 0.16      | 0.34      |
| - month 24 <sup>^</sup>              | -0.17     | 0.14      | 0.21      | -0.17     | 0.16      | 0.32      |
|                                      | -0.28     | 0.15      | 0.06      | -0.21     | 0.16      | 0.20      |

# Two-way interaction: PD solution type X Time. PD: peritoneal dialysis



**Supplemental Table 2: Univariable logistic regression showing association between tertiles of baseline interleukin-6 concentrations and all-cause mortality.**

| <b>Variable</b> | <b>Odds ratio</b> | <b>95% confidence interval</b> | <b>P values</b> |
|-----------------|-------------------|--------------------------------|-----------------|
| IL-6 Tertiles   |                   |                                |                 |
| - 1             | Reference         | Reference                      | Reference       |
| - 2             | 7.84              | 0.93-65.95                     | 0.06            |
| - 3             | 10.72             | 1.31-87.75                     | 0.03            |



Supplement: supp_2013.00272_Supplemental_Materials.pdf [file supp_2013.00272_Supplemental_Materials.pdf]
